# Supplementary material for: Model-based genome-wide determination of RNA chain elongation rates in Escherichia coli
Source: PubMed Central journal article supplement (PMC5722913; doi:10.1038/s41598-017-17408-9), 2017-12-08
Supplement: 41598_2017_17408_MOESM1_ESM.pdf [file 41598_2017_17408_MOESM1_ESM.pdf]

Model-based genome-wide determination of RNA chain elongation  
rates in *Escherichia coli*  
Supporting Tables and Figures

Peter Großmann, Anja Lück, and Christoph Kaleta

July 13, 2017

**List of Tables**

|   |                                                                                         |   |
|---|-----------------------------------------------------------------------------------------|---|
| 1 | Significantly enriched or depleted GO terms. . . . .                                    | 2 |
| 2 | The contribution of different relative codon abundances to transcription speed. . . . . | 6 |
| 3 | Variable importance in speed prediction without mRNA half life . . . . .                | 7 |

**List of Figures**

|   |                                                                                                                             |   |
|---|-----------------------------------------------------------------------------------------------------------------------------|---|
| 1 | Essential genes have a short regulation delay while transcription factor proteins have an average regulation delay. . . . . | 3 |
| 2 | Genetic and dynamic properties that influence transcription speed. . . . .                                                  | 4 |
| 3 | Protein counts strongly correlate with the Codon Adaptation Index in M9 minimal medium. . . . .                             | 4 |
| 4 | Influence of codon wobbling and mRNA structure . . . . .                                                                    | 5 |



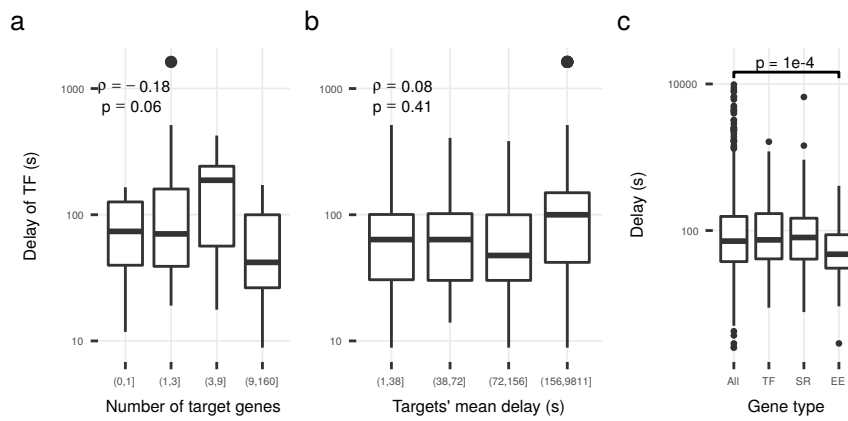

Figure 1: Essential genes (EE) have a short regulation delay while transcription factor proteins (TFs) have an average regulation delay. **a, b:** There is no general difference in regulation delays between TFs with different numbers of target genes or different mean regulation delays of target genes. **c:** The 113 essential genes in our growth condition have a lower than average regulation delay. The regulation delays of TFs and stress response (SR) genes overall do not differ from those of all genes.

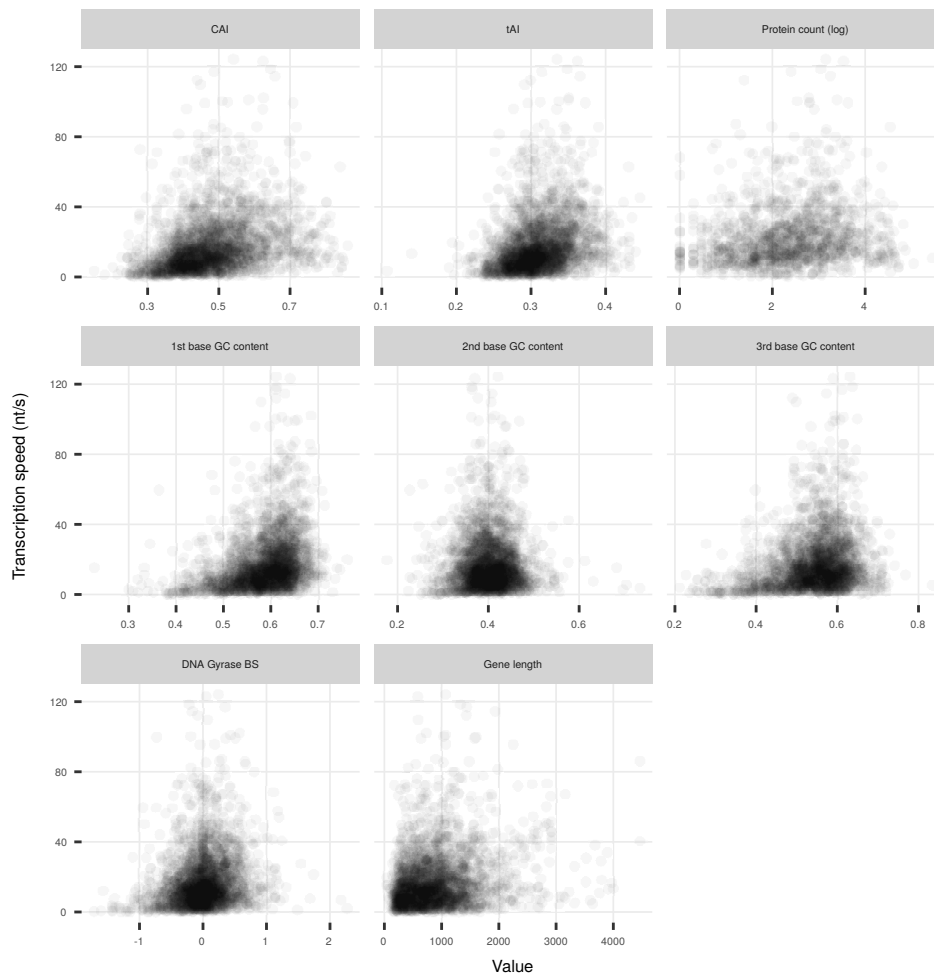

Figure 2: Each observation corresponds to one gene. DNA gyrase Binding Strength (BS) is measured in log-fold change in a two-colour microarray experiment upon cleavage at sites bound by DNA gyrase [2].

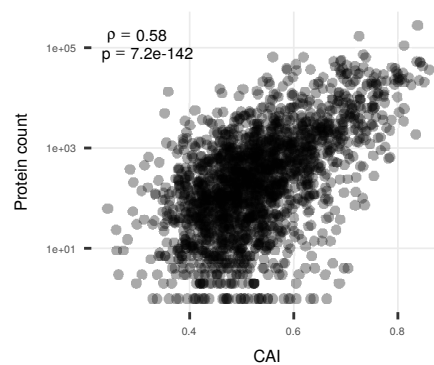

Figure 3: Protein counts strongly correlate with the Codon Adaptation Index in M9 minimal medium.

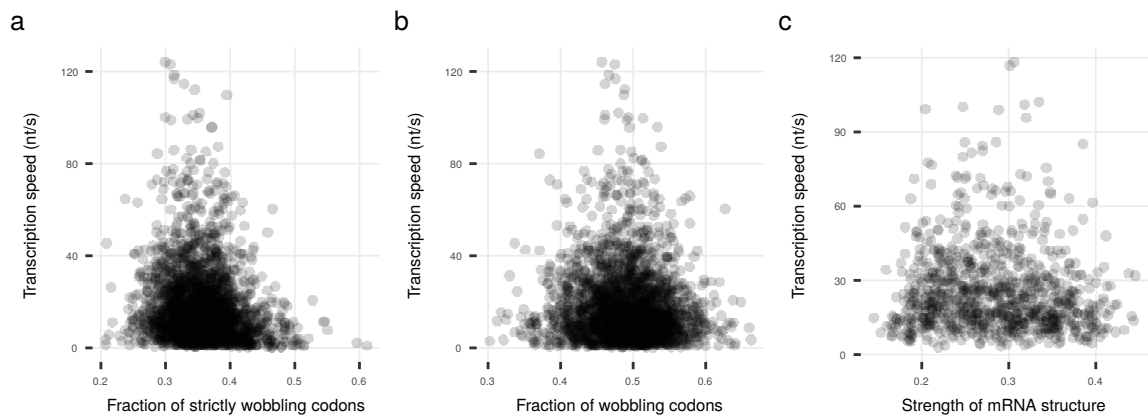

Figure 4: Codon wobbling and the strength of the mRNA structure negatively influence transcription speed. Codons with only **a**: wobble base pairing tRNAs and **b**: those with additional non-wobble base pairing tRNAs slow down transcription. **c**: Strong mRNA structure tends to slow down transcription similarly to codon wobbling.

Table 2: The contribution of different relative codon abundances to transcription speed. a: correlation with transcription speed. b: belongs to the group of rare codons or has low associated tRNA levels [3]. c: has only strictly matching anticodons or has only wobble-base pairing anticodons [1].

| Codon | $\rho^a$ | p         | Rare codon <sup>b</sup> | Non-isoaccepted <sup>c</sup> | Only isoaccepted <sup>c</sup> |
|-------|----------|-----------|-------------------------|------------------------------|-------------------------------|
| AUA   | -0.26    | 2.220e-16 | X                       |                              | X                             |
| UUA   | -0.237   | 2.220e-16 | X                       | X                            |                               |
| UCA   | -0.226   | 2.220e-16 | X                       | X                            |                               |
| AGA   | -0.207   | 2.220e-16 | X                       | X                            |                               |
| AGG   | -0.198   | 2.220e-16 | X                       | X                            |                               |
| ACA   | -0.197   | 2.220e-16 | X                       | X                            |                               |
| AAU   | -0.182   | 2.220e-16 |                         |                              | X                             |
| UUU   | -0.182   | 2.220e-16 |                         |                              | X                             |
| GGA   | -0.177   | 2.220e-16 |                         | X                            |                               |
| AGU   | -0.158   | 2.220e-16 |                         |                              | X                             |
| CGA   | -0.158   | 2.220e-16 |                         |                              | X                             |
| AUU   | -0.133   | 7.124e-12 |                         |                              | X                             |
| CUA   | -0.125   | 1.107e-10 | X                       | X                            |                               |
| CUU   | -0.124   | 1.309e-10 |                         |                              | X                             |
| UAU   | -0.123   | 1.633e-10 |                         |                              | X                             |
| UUG   | -0.107   | 3.615e-08 |                         |                              |                               |
| CCC   | -0.102   | 1.565e-07 | X                       | X                            |                               |
| CAA   | -0.099   | 3.425e-07 |                         | X                            |                               |
| CGG   | -0.099   | 3.425e-07 | X                       | X                            |                               |
| UGU   | -0.095   | 1.108e-06 | X                       |                              | X                             |
| UGG   | -0.091   | 2.810e-06 |                         | X                            |                               |
| CCU   | -0.082   | 2.439e-05 | X                       |                              | X                             |
| UAG   | -0.073   | 1.718e-04 |                         |                              |                               |
| GGG   | -0.05    | 1.282e-02 |                         |                              |                               |
| UGA   | -0.039   | 5.827e-02 |                         | X                            |                               |
| ACG   | -0.037   | 7.395e-02 |                         |                              |                               |
| UAA   | -0.035   | 8.631e-02 |                         |                              |                               |
| AUG   | -0.03    | 1.512e-01 |                         | X                            |                               |
| ACU   | -0.029   | 1.665e-01 |                         |                              | X                             |
| CCA   | -0.026   | 2.005e-01 | X                       | X                            |                               |
| UCG   | -0.025   | 2.201e-01 |                         |                              |                               |
| CUC   | -0.024   | 2.356e-01 |                         | X                            |                               |
| CAU   | -0.022   | 2.871e-01 |                         |                              | X                             |
| GCU   | -0.021   | 2.918e-01 |                         |                              |                               |
| UCU   | -0.017   | 3.958e-01 |                         |                              | X                             |
| GUC   | -0.009   | 6.730e-01 | X                       | X                            |                               |
| GCA   | -0.008   | 7.224e-01 |                         |                              |                               |
| GUU   | -0.007   | 7.334e-01 |                         |                              | X                             |
| UGC   | 0.003    | 8.944e-01 |                         | X                            |                               |
| AAG   | 0.007    | 7.334e-01 |                         |                              | X                             |
| GUA   | 0.009    | 6.730e-01 |                         |                              | X                             |
| AAA   | 0.023    | 2.726e-01 |                         | X                            |                               |
| AGC   | 0.032    | 1.232e-01 |                         | X                            |                               |
| UCC   | 0.041    | 4.170e-02 | X                       | X                            |                               |
| GCC   | 0.066    | 7.600e-04 |                         | X                            |                               |
| AUC   | 0.07     | 3.611e-04 |                         | X                            |                               |
| UAC   | 0.071    | 2.828e-04 |                         | X                            |                               |
| GAU   | 0.076    | 1.048e-04 |                         |                              | X                             |
| UUC   | 0.083    | 1.998e-05 |                         | X                            |                               |
| GAG   | 0.094    | 1.310e-06 |                         |                              | X                             |
| GUG   | 0.11     | 1.418e-08 |                         |                              | X                             |
| CAG   | 0.115    | 2.870e-09 |                         | X                            |                               |
| AAC   | 0.122    | 2.253e-10 |                         | X                            |                               |
| CAC   | 0.125    | 1.130e-10 |                         | X                            |                               |
| GGU   | 0.132    | 9.286e-12 |                         |                              | X                             |
| ACC   | 0.143    | 1.400e-13 |                         | X                            |                               |
| GCG   | 0.162    | 2.220e-16 |                         |                              | X                             |
| GGC   | 0.191    | 2.220e-16 |                         | X                            |                               |
| CGC   | 0.197    | 2.220e-16 |                         |                              | X                             |
| GAA   | 0.201    | 2.220e-16 |                         | X                            |                               |
| GAC   | 0.225    | 2.220e-16 |                         | X                            |                               |
| CUG   | 0.228    | 2.220e-16 |                         |                              |                               |
| CCG   | 0.247    | 2.220e-16 |                         |                              |                               |
| CGU   | 0.263    | 2.220e-16 |                         | X                            |                               |

Table 3: Variable importance in speed prediction by Random Forest without use of the mRNA half life. The variables are ranked by importance, larger values indicate more important variables.

| Variable         | Importance |
|------------------|------------|
| mRNA level       | 169.7      |
| RNAP density     | 98.7       |
| mRNA level       | 62.7       |
| RNAP density     | 8.7        |
| CAI              | 6.7        |
| tAI              | 5.7        |
| gene length      | 4.1        |
| 3rd base-GC bias | 3.5        |
| 1st base-GC bias |            |

## References

- [1] Hengjiang Dong, Lars Nilsson, and Charles G. Kurland. Co-variation of tRNA Abundance and Codon Usage in *Escherichia coli* at Different Growth Rates. *Journal of Molecular Biology*, 260(5):649 – 663, 1996.
- [2] Kyeong Jeong, Jaeyong Ahn, and Arkady Khodursky. Spatial patterns of transcriptional activity in the chromosome of *Escherichia coli*. *Genome Biology*, 5(11):R86, 2004.
- [3] Gong Zhang, Magdalena Hubalewska, and Zoya Ignatova. Transient ribosomal attenuation coordinates protein synthesis and co-translational folding. *Nature Structural & Molecular Biology*, 16(3):274–280, 2009.
